# Supplementary material for: Identification of potential plasma biomarkers in early-stage nasopharyngeal carcinoma-derived exosomes based on RNA sequencing
Source: PubMed Central journal article supplement (PMC8011216; doi:10.1186/s12935-021-01881-4), 2021-03-31

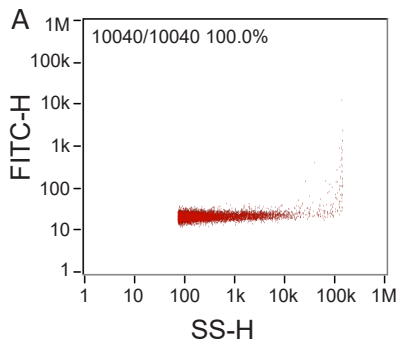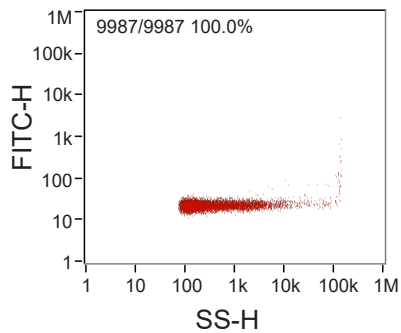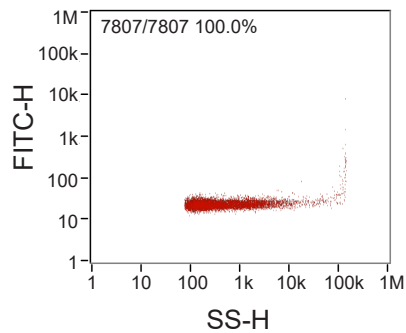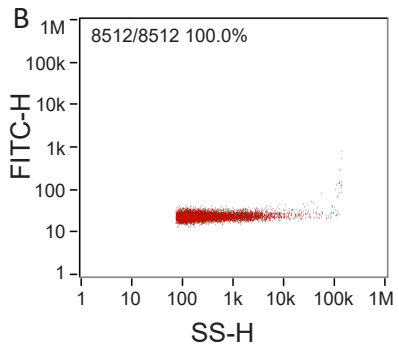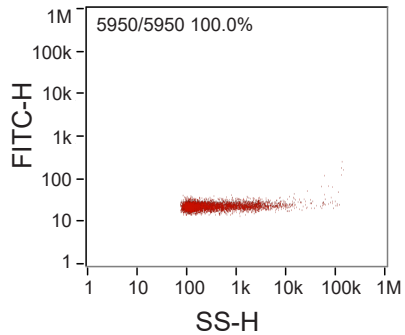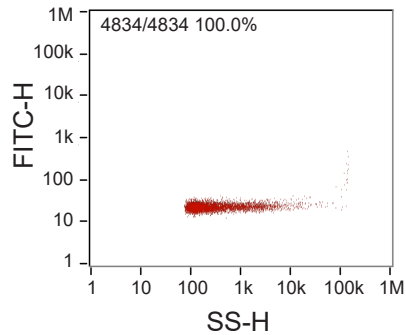

Supplement: 12935_2021_1881_MOESM1_ESM.pdf [file 12935_2021_1881_MOESM1_ESM.pdf]
